# Supplementary material
Source: HighWire-hosted journal article supplement (https://bmjopenquality.bmj.com/highwire/filestream/135896/field_highwire_adjunct_files/1/ds7030.docx)
Supplement: ds7030.docx [file ds7030.docx]

Figure 1. Observation protocol used to evaluate the quality of handovers.


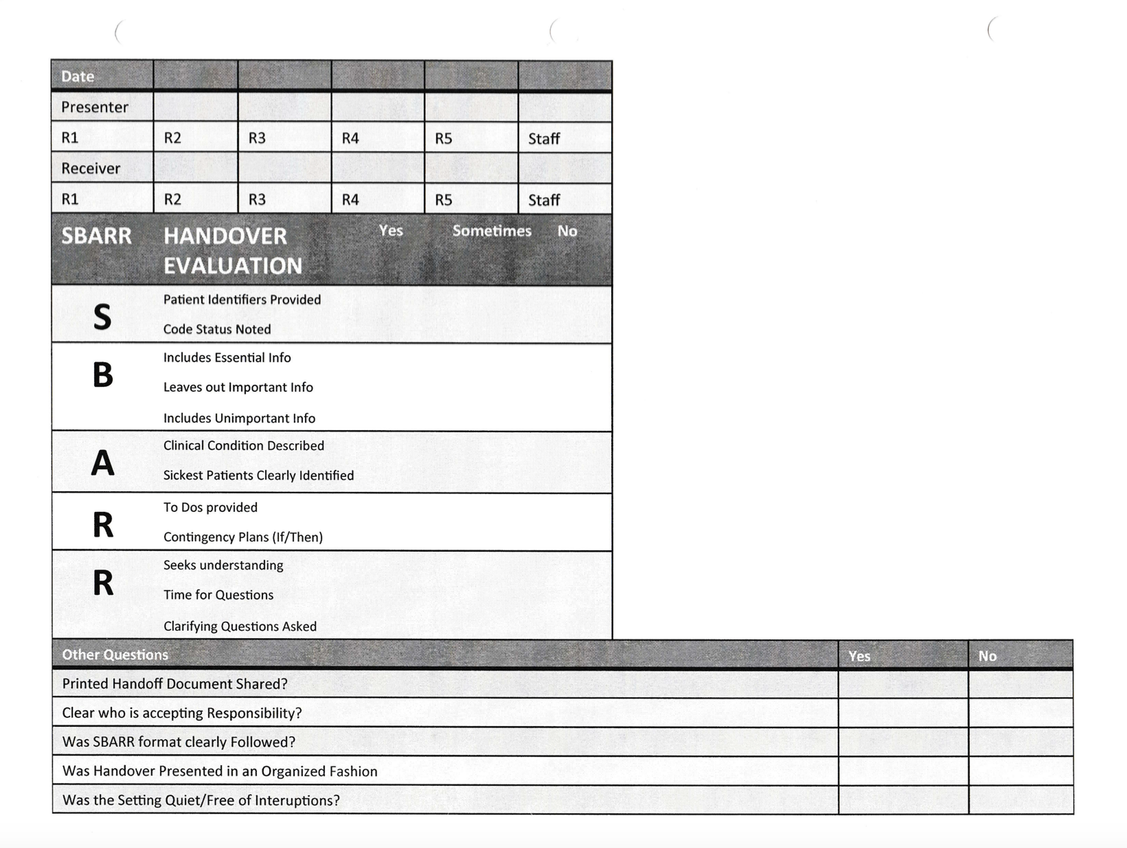


Note: *R1* through *R5* indicates *Resident* and her or his year in the program.
